# Supplementary material for: Impact of protocolized diuresis for de-resuscitation in the intensive care unit
Source: Crit Care. 2020 Feb 28;24:70. doi: 10.1186/s13054-020-2795-9 (PMC7048112; doi:10.1186/s13054-020-2795-9)
Supplement: Supplementary file 1 — Additional file 1. Supplementary Digital Content This file includes relevant study protocols, definitions, as well as subgroup analyses and additional informational tables beyond manuscript content. [file 13054_2020_2795_MOESM1_ESM.pdf]

## **Supplementary Digital Content**

**Appendix A.** Intensive Care Unit Electrolyte Replacement Protocol

**Appendix B.** Study Definitions

**eFigure 1.** Pre-Modification Diuresis Protocol

**eFigure 2.** Post-Modification Diuresis Protocol

**eTable 1.** Study Inclusion and Exclusion Criteria

**eTable 2.** Additional Baseline Characteristics

**eTable 3.** Primary Diagnosis Code Groups

**eTable 4.** Subgroup Analysis of Pre- and Post-Modification Enrollment

**eTable 5.** Subgroup Analysis for 72-Hour Post-Shock Fluid Balance

**eTable 6.** Interrupted Time Series Analysis

**eTable 7.** Logistic Regression for All-Cause Mortality

**eTable 8.** Indication for Furosemide Dose Holds in Intervention Group

## **Appendix A:**

### **(a) Intensive Care Unit Electrolyte Replacement Protocol General Criteria**

#### **Summary**

Standing electrolyte replacement protocols are available for use in adult patients admitted to an intensive care unit or progressive care upon direct physician order entry in the EMR.

#### **Requirements**

- Physician may order via physician order entry in EMR electrolyte replacement protocol for Potassium chloride, Magnesium sulfate, Phosphorous, or Calcium gluconate individually or in combination. This authorizes the nurse to order and administer all electrolyte replacement doses and laboratory orders as defined per protocol.
- Replacement protocols should NOT be used in patients with:
  - a) serum creatinine (SCr) > 2 mg/dL
  - b) urinary output < 30 mL/hr
  - c) patients requiring hemodialysis
  - d) weight < 50 kg
  - e) patients undergoing targeted temperature management (therapeutic hypothermia)
- Physician should be notified if electrolyte deficiency does not correct after two rounds of electrolyte replacement in 24 hours.
- Nursing should preferentially use oral over intravenous replacement whenever possible.
  - Use oral replacement when the patient is getting other oral or per tube medications.
  - If the patient is actively receiving vasopressors, oral replacement can only occur after a discussion with the provider.

(b) Intensive Care Unit Electrolyte Replacement Protocol Potassium Chloride Replacement

- Telemetry monitoring is required for infusion rates > 10 mEq/hr.
- If serum potassium level < 3 mEq/L, order STAT magnesium level if no result in prior 24 hours.
- If both serum magnesium and potassium levels are low, initiate magnesium for 1 hour prior to starting potassium repletion.

| Serum Potassium Level (mEq/L)                    | Total Replacement            | Central IV Administration<br>(Rate 20 mEq/hr) | Peripheral IV Administration<br>(Rate 10 mEq/hr) | Oral Administration<br>ER Tablet                                                        | Oral Administration<br>Nothing by mouth                                                    | Potassium Re-Check                 |
|--------------------------------------------------|------------------------------|-----------------------------------------------|--------------------------------------------------|-----------------------------------------------------------------------------------------|--------------------------------------------------------------------------------------------|------------------------------------|
| 3.7 – 4                                          | 40 mEq                       | 20 mEq/50 mL IV x 2 dose                      | 10 mEq/100 mL IV every hour x 4 doses            | 10 mEq x 4 tablets PO                                                                   | 20 mEq x 2 packets PO/FT                                                                   | No additional action               |
| 3.4 – 3.6                                        | 60 mEq                       | 20 mEq/50 mL IV every hour x 3 doses          | 10 mEq/100 mL IV every hour x 6 doses            | 10 mEq x 6 tablets PO                                                                   | 20 mEq x 3 packets PO/FT                                                                   | 2 hours after replacement complete |
| 3 – 3.3                                          | 80 mEq                       | 20 mEq/50 mL IV every hour x 4 doses          | 10 mEq/100 mL IV every hour x 8 doses            | 10 mEq x 4 tablets PO every 4 hours x 2 doses                                           | 20 mEq x 2 packets PO/FT every 4 hours x 2 doses                                           | 2 hours after replacement complete |
| < 3<br><i>STAT serum Mag if none in 24 hours</i> | 100 mEq and notify physician | 20 mEq/50 mL IV every hour x 5 doses          | 10 mEq/100 mL IV every hour x 10 doses           | 10 mEq x 4 tablets PO + 20 mEq IV every hour x 3 doses (central line only) <sup>a</sup> | 20 mEq x 2 packets PO/FT + 20 mEq IV every hour x 3 doses (central line only) <sup>b</sup> | 2 hours after replacement complete |

<sup>a</sup> If peripheral IV access only: 10 mEq x 4 tablets PO plus 10 mEq/100 mL IV every hour x 6 doses; <sup>b</sup> If peripheral IV access only: 20 mEq x 2 packets PO/FT + 10 mEq/100 mL IV every hour x 6 doses; mEq, miliequivalents; mL, milliliters; IV, intravenous; PO, per mouth; FT, per feeding tube

(c) Intensive Care Unit Electrolyte Replacement Protocol Magnesium Sulfate IV Replacement

- If both serum magnesium and potassium levels are low, initiate magnesium repletion for 1 hour prior to starting potassium repletion.

| Serum Magnesium Level (mg/dL)     | Total Magnesium Sulfate Replacement IV                                      | Serum Magnesium Re-Check <sup>a,b</sup> |
|-----------------------------------|-----------------------------------------------------------------------------|-----------------------------------------|
| 1.5 – 1.8                         | 2 grams/50 mL IV over 4 hour                                                | No additional action                    |
| 1.2 – 1.4                         | 4 grams /100 mL IV x 2 each over 8 hours                                    | 2 hours after final infusion complete   |
| < 1.2 (asymptomatic)              | 4 grams /100 mL IV x 3 each over 8 hours and notify physician               | 2 hours after final infusion complete   |
| < 1.2 (symptomatic <sup>a</sup> ) | 2 grams IVP, then 4 gm/100 mL IV x 3 each over 8 hours and notify physician | 2 hours after final infusion complete   |

<sup>a</sup> If a scheduled lab draw which includes the electrolyte needing reassessment is within 4 hours after the total electrolyte replacement administration, no additional lab draw is needed. If no lab draw is scheduled, draw as instructed per protocol; <sup>b</sup> Symptoms of hypomagnesaemia include: 1) Neuromuscular - hyperexcitability (tremor, tetany, convulsions), weakness, apathy, delirium, and coma, 2) Cardiovascular - widening of the QRS and peaking of T waves with moderate magnesium depletion and atrial and ventricular arrhythmias with severe depletion, 3) Hypokalemia; mL, milliliters; IV, intravenous

(c) Intensive Care Unit Electrolyte Replacement Protocol Magnesium Oxide Oral Replacement

- If both serum magnesium and potassium levels are low, initiate magnesium repletion for 1 hour prior to starting potassium repletion.
- DO NOT replace magnesium orally unless the magnesium oxide is specifically ordered for the patient AND use caution if patient is having more than 3 loose bowel movements daily

| Serum Magnesium Level (mg/dL)     | Total Magnesium Replacement PO (magnesium oxide) | Serum Magnesium Re-Check <sup>a,b</sup> |
|-----------------------------------|--------------------------------------------------|-----------------------------------------|
| 1.5 – 1.8                         | 400 mg PO/FT                                     | No additional action                    |
| 1.2 – 1.4                         | 400 mg PO/FT every 4 hours x 2                   | 2 hours after final infusion complete   |
| < 1.2 (asymptomatic)              | 400 mg PO/FT every 4 hours x 3                   | 2 hours after final infusion complete   |
| < 1.2 (symptomatic <sup>a</sup> ) | Notify physician                                 | 2 hours after final infusion complete   |

<sup>a</sup> If a scheduled lab draw which includes the electrolyte needing reassessment is within 4 hours after the total electrolyte replacement administration, no additional lab draw is needed. If no lab draw is scheduled, draw as instructed per protocol; <sup>b</sup> Symptoms of hypomagnesaemia include: 1) Neuromuscular - hyperexcitability (tremor, tetany, convulsions), weakness, apathy, delirium, and coma, 2) Cardiovascular - widening of the QRS and peaking of T waves with moderate magnesium depletion and atrial and ventricular arrhythmias with severe depletion, 3) Hypokalemia; PO, by mouth; FT, per feeding tube

(d) Intensive Care Unit Electrolyte Replacement Protocol Phosphorous Replacement

- IV sodium phosphorus doses are rounded to the nearest 15 mmol. Available products will be:
- For administration via central line either 15mmol in 100 ml NS, 30 mmol in 100 ml NS or 45 mmol in 250 ml NS
- For administration via a peripheral line either 15 mmol in 250 ml NS, 30 mmol in 500 ml NS or 45 mmol in 500 ml NS

| <b>Serum Phosphorous Level (mg/dL)</b> | <b>Sodium Phosphorus IV replacement<sup>a,b</sup></b>                           | <b>Oral Administration<br/>(Phospha 250 Neutral tablet, 8 mmol)</b>                                                                    | <b>Oral Administration<br/>Nothing by Mouth<br/>(PhosNaK packet, 8 mmol)</b>                                                              | <b>Serum Phosphate Re-Check<sup>c</sup></b> |
|----------------------------------------|---------------------------------------------------------------------------------|----------------------------------------------------------------------------------------------------------------------------------------|-------------------------------------------------------------------------------------------------------------------------------------------|---------------------------------------------|
| 2.7 – 3                                | None                                                                            | 1 tablet PO two times daily x 2 doses                                                                                                  | 1 packet PO/FT two times daily x 2 doses                                                                                                  | No additional action                        |
| 2.1 – 2.6                              | 0.16 mmol/kg IBW <sup>e</sup> (max 15 mmol) IV over 4 hours                     | 1 tablet PO three times daily x 3 doses                                                                                                | 1 packet PO/FT three times daily x 3 doses                                                                                                | No additional action                        |
| 1 – 2                                  | 0.24 mmol/kg IBW <sup>e</sup> (max 30 mmol) IV x over 4 hours                   | 2 tablets PO three times daily x 3 doses                                                                                               | 2 packets PO/FT three times daily x 3 doses                                                                                               | 2 hours after replacement complete          |
| < 1                                    | 0.5 mmol/kg IBW <sup>e</sup> (max 45 mmol) IV over 6 hours and notify physician | 0.16 mmol/kg IBW <sup>e</sup> (max 15 mmol) <sup>d</sup> IV over 4 hours + 2 tablets PO three times daily x 3 doses + notify physician | 0.16 mmol/kg IBW <sup>e</sup> (max 15 mmol) <sup>d</sup> IV over 4 hours + 2 packets PO/FT three times daily x 3 doses + notify physician | 2 hours after replacement complete          |

<sup>a</sup> IV phosphate repletion utilizes Sodium phosphate only. Potassium replacement should be done separately; <sup>b</sup>IV phosphorus dosing are based on IBW; <sup>c</sup>If a scheduled lab draw which includes the electrolyte needing reassessment is within 4 hours after the total electrolyte replacement administration, no additional lab draw is needed. If no lab draw is scheduled, draw as instructed per protocol; IBW, ideal body weight; IV, intravenous; mmol, millimole; kg, kilogram; PO, by mouth; FT, per feeding tube

(e) Intensive Care Unit Electrolyte Replacement Protocol Calcium Gluconate Replacement

| <b>Ionized Calcium Level (mg/dL)</b>     | <b>Total Calcium Replacement<sup>a</sup></b>    | <b>Serum Calcium Re-Check<sup>b,c</sup></b> |
|------------------------------------------|-------------------------------------------------|---------------------------------------------|
| 3.4 – 4.6<br>(asymptomatic)              | None                                            | 12 hours                                    |
| 3.4 – 4.6<br>(symptomatic <sup>f</sup> ) | Calcium gluconate 1 gm/100 mL IV<br>over 30 min | 2 hours after infusion<br>completed         |
| < 3.4                                    | Calcium gluconate 2 gm/100 mL IV<br>over 1 hour | 2 hours after infusion<br>completed         |

<sup>a</sup> Vesicant precautions: Central Line preferred but ok to give as peripheral infusions done separately; <sup>b</sup>Symptoms of acute hypocalcemia include: 1) Neuromuscular – tetany, paresthesias (peri-oral, extremities), muscle twitching, carpopedal spasms, seizures, laryngospasm, bronchospasm, 2) Cardiac - prolonged QT interval, hypotension, heart failure, arrhythmia, 3) Papilledema; <sup>c</sup>If a scheduled lab draw which includes the electrolyte needing reassessment is within 4 hours after the total electrolyte replacement administration, no additional lab draw is needed. If no lab draw is scheduled, draw as instructed per protocol

## Appendix B:

- I. Hypernatremia – serum sodium greater than 150 mmol/L
- II. Net positive fluid balance - any volume status value above a 0 mL net volume
- III. Nephrotoxins - aminoglycosides, amphotericin, beta-lactam therapy, intravenous antivirals, intravenous vancomycin, and sulfamethoxazole-trimethoprim.
- IV. Shock resolution - freedom from vasopressor administration or bolus crystalloid administration for at least 12 hours.
- V. Ventilator-free days - the number of days from day 1 to day 28 in which a patient was able to breathe without assistance with death as a competing risk with an assignment of zero free-days
- VI. KDIGO AKI Criteria - serum creatinine 1.5 times serum creatinine prior to diuresis initiation, serum creatinine increase of at least 0.3 mg/dL within 48 hours, or urine output  $<0.5$  mL/kg/hr for at least 6 hours

**eFigure 1.** Pre-Modification Diuresis Protocol

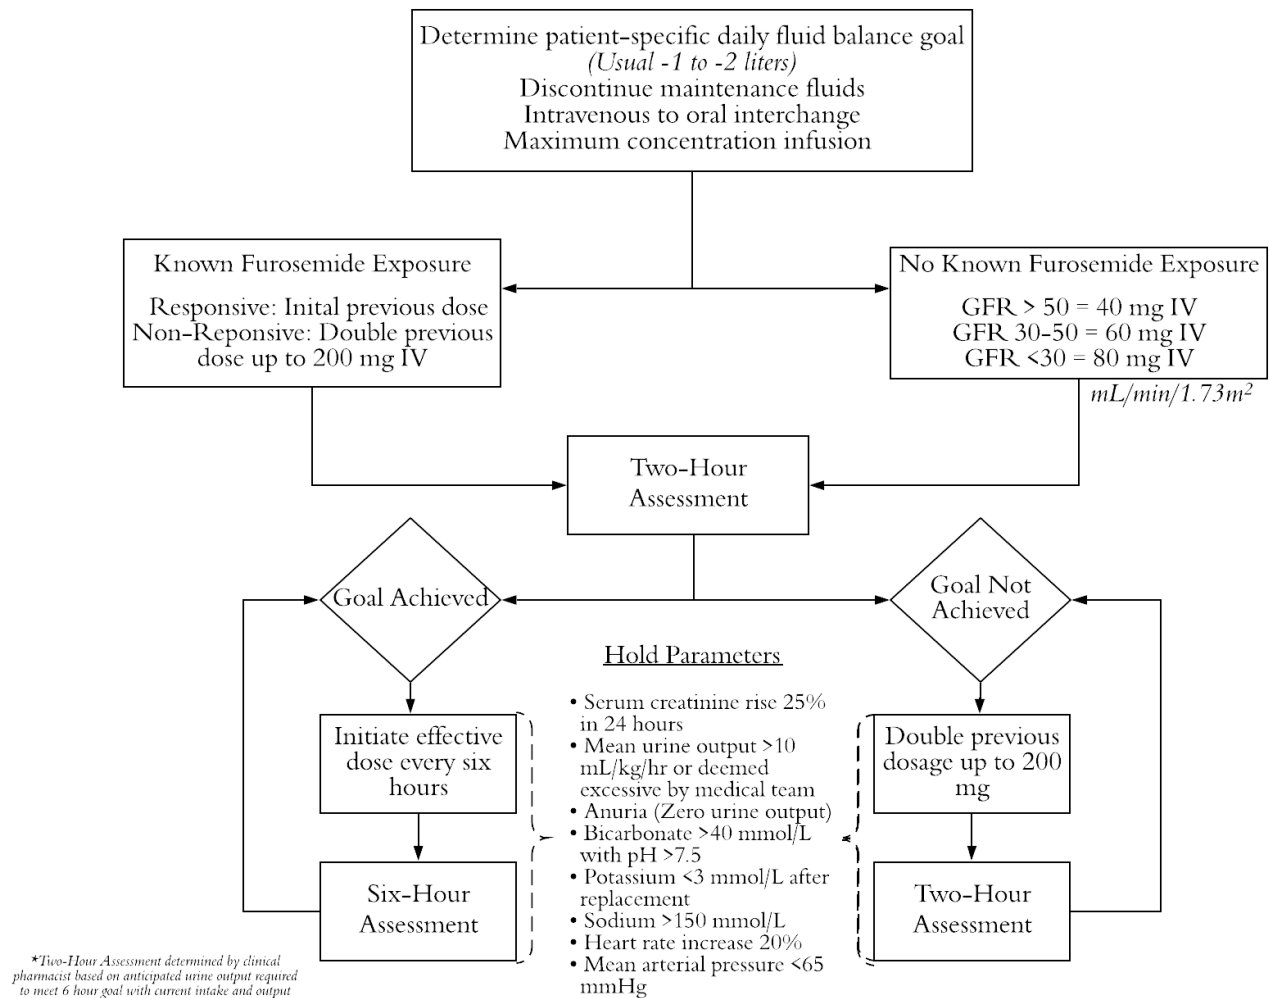

**eFigure 2.** Post-Modification Diuresis Protocol

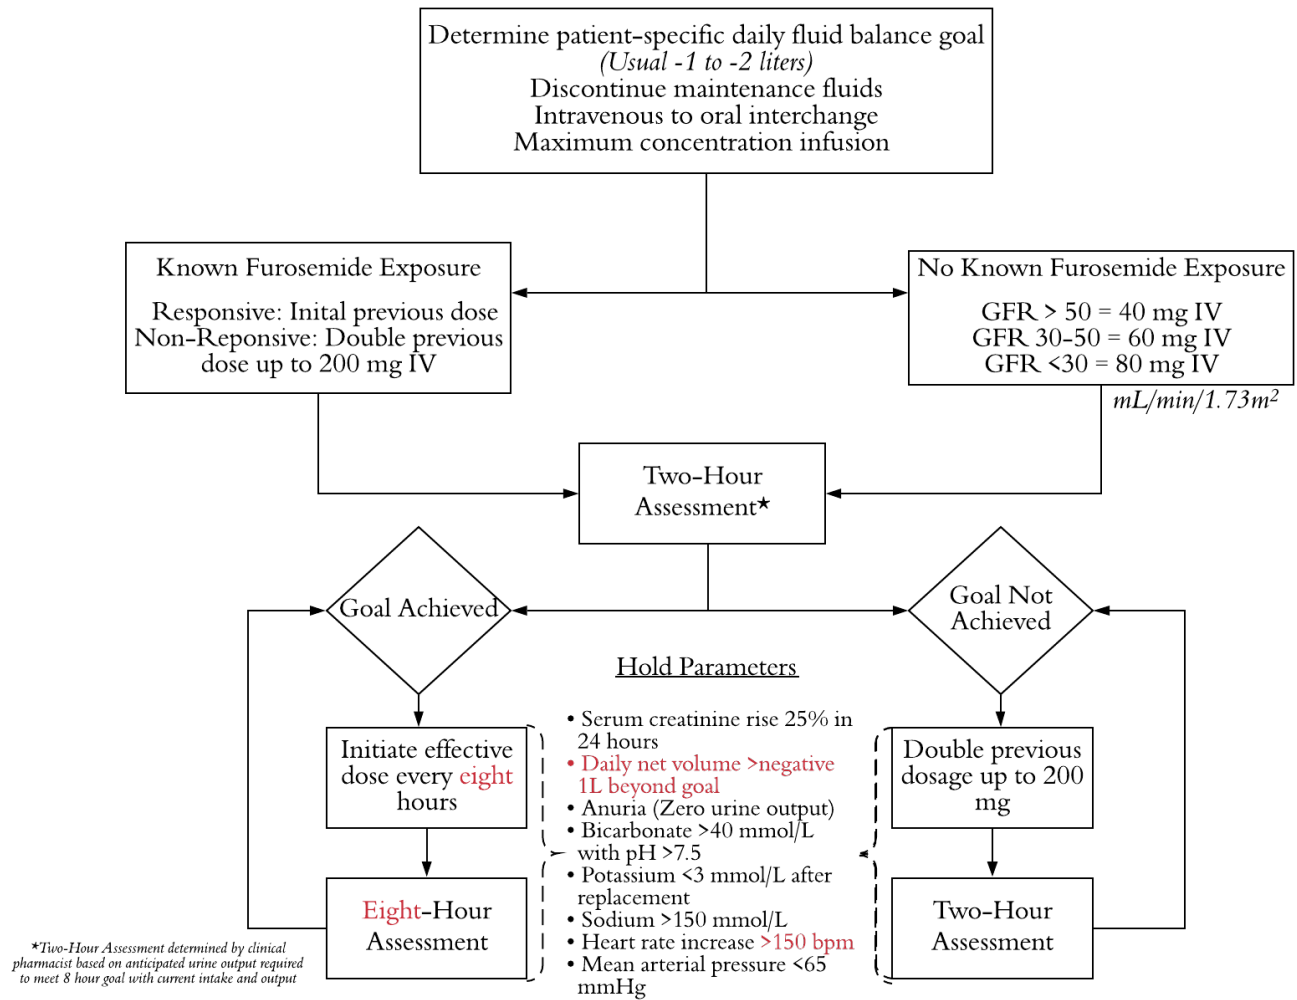

**eTable 1.** Study Inclusion and Exclusion Criteria

| Inclusion Criteria                                                                                                                                                                        | Exclusion Criteria                                                                                                                                                                                                                                                                     |
|-------------------------------------------------------------------------------------------------------------------------------------------------------------------------------------------|----------------------------------------------------------------------------------------------------------------------------------------------------------------------------------------------------------------------------------------------------------------------------------------|
| ≥18 years old admitted to the pilot Medical Intensive Care Unit (MICU)                                                                                                                    | Comfort care decision to limit support or imminent death, as decided by MICU team                                                                                                                                                                                                      |
|                                                                                                                                                                                           | Nephrology consult for stage 3 acute kidney injury, defined as ≤0.3 mL/kg/hr urine output for at least 12 hours, serum creatinine (SCr) 3 times baseline, a SCr ≥4, or receipt of renal replacement therapy                                                                            |
| Receiving mechanical ventilation with net positive or net even fluid balance or signs of fluid overload on chest x- ray or clinical examination                                           | Acute treatment of any of the following: <ul style="list-style-type: none"> <li>1. Diabetic ketoacidosis/Hyperosmolar hyperglycemic state</li> <li>2. Rhabdomyolysis with a creatine kinase level &gt;5000 units/liter</li> <li>3. Suspected hepatorenal syndrome</li> </ul>           |
|                                                                                                                                                                                           | End-stage kidney disease or anuria (zero urine output for at least 12 hours)                                                                                                                                                                                                           |
| Hemodynamically stable, defined as absence of vasopressor administration or bolus crystalloid administration within 12 hours, unless cardiogenic shock or norepinephrine <0.05 mcg/kg/min | Chronic restrictive, obstructive, neuromuscular, chest wall or pulmonary vascular disease resulting in severe exercise restriction, secondary polycythemia, severe pulmonary hypertension (mean PAP >40 mmHg), or respirator dependency preventing further mechanical ventilation wean |
|                                                                                                                                                                                           | Pregnancy demonstrated via serum hCG                                                                                                                                                                                                                                                   |
|                                                                                                                                                                                           | No history of neuromuscular disease that impairs ability to ventilate spontaneously, such as C5 or higher spinal cord injury, amyotrophic lateral sclerosis, Guillain-Barre Syndrome, and myasthenia gravis                                                                            |

**eTable 2.** Additional Baseline Characteristics

| Parameter                                      | Historical Cohort (n=273) | Intervention Cohort (n=91) | p-Value |
|------------------------------------------------|---------------------------|----------------------------|---------|
| <b>Past Medical History</b>                    |                           |                            |         |
| Chronic Respiratory Failure <sup>b</sup>       | 89 (32.6)                 | 28 (30.8)                  | 0.746   |
| DKA or HHS <sup>c</sup>                        | 0 (0)                     | 1 (1.1)                    | 0.250   |
| Hepatorenal Syndrome <sup>c</sup>              | 4 (1.5)                   | 0                          | 0.576   |
| Pulmonary Hypertension <sup>c</sup>            | 0                         | 0                          | 1.000   |
| Renal Transplant <sup>c</sup>                  | 1 (0.4)                   | 0                          | 1.000   |
| <b>Other Admission Parameters</b>              |                           |                            |         |
| Admission Weight (kilograms [kg]) <sup>a</sup> | 92 (74-110)               | 89 (68-117)                | 0.813   |
| Rhabdomyolysis <sup>c</sup>                    | 0 (0)                     | 8 (8.8)                    | <0.001  |
| Mean Arterial Pressure (mmHg) <sup>a</sup>     | 81 (73-91)                | 82 (71-91)                 | 0.904   |
| Heart Rate (bpm) <sup>a</sup>                  | 91 (80-104)               | 88 (75-101)                | 0.178   |
| Time Since Shock Resolution <sup>a</sup>       | 38 (10-72)                | 38 (6-77)                  | 0.721   |
| Home Furosemide <sup>b</sup>                   | 31 (11.3)                 | 6 (6.6)                    | 0.193   |
| Home Furosemide Dose (mg) <sup>a</sup>         | 40 (40-40)                | 40 (20-40)                 | 0.294   |
| <b>Laboratory Results</b>                      |                           |                            |         |
| Serum Creatinine (mg/dL) <sup>a</sup>          | 0.86 (0.63-1.30)          | 0.80 (0.66-1.14)           | 0.378   |
| Blood Urea Nitrogen (mg/dL) <sup>a</sup>       | 23 (15-34)                | 25 (15-37)                 | 0.691   |
| pH, Arterial <sup>a</sup>                      | 7.38 (7.29-7.44)          | 7.42 (7.37-7.45)           | 0.009   |
| pH, Venous <sup>a</sup>                        | 7.37 (7.31-7.42)          | 7.43 (7.36-7.46)           | 0.104   |
| Sodium (mmol/L) <sup>d</sup>                   | 142 (5)                   | 143 (4)                    | 0.051   |
| Potassium (mmol/L) <sup>a</sup>                | 4.1 (3.8-4.4)             | 4.1 (3.8-4.4)              | 0.382   |
| Bicarbonate (mmol/L) <sup>d</sup>              | 27 (7)                    | 29 (5)                     | 0.121   |
| Chloride (mmol/L) <sup>d</sup>                 | 105 (6)                   | 106 (6)                    | 0.291   |
| Albumin (g/dL) <sup>a</sup>                    | 2.1 (1.7-2.5)             | 2 (1.5-2.2)                | 0.191   |

**eTable 3.** Primary Diagnosis Code Groups

|                                     | Historical<br>Cohort (n=273) | Intervention<br>Cohort (n=91) | p-Value |
|-------------------------------------|------------------------------|-------------------------------|---------|
| Cardiac Procedure or Disorder       | 9 (3.3)                      | 2 (2.2)                       | 0.738   |
| Dermatologic Disorder               | 4 (1.5)                      | 0 (0)                         | 0.576   |
| Gastrointestinal/Endocrine Disorder | 9 (3.3)                      | 2 (2.2)                       | 0.738   |
| Gynecology/Urology                  | 2 (0.7)                      | 3 (3.3)                       | 0.102   |
| Hematology/Malignancy               | 2 (0.7)                      | 2 (2.2)                       | 0.261   |
| Immunologic Disorder                | 4 (1.5)                      | 1 (1.1)                       | 1.000   |
| Liver Disease                       | 8 (2.9)                      | 2 (2.2)                       | 1.000   |
| Neurologic Disorder                 | 9 (3.3)                      | 7 (7.7)                       | 0.076   |
| Post-Operative                      | 11 (4.0)                     | 3 (3.3)                       | 1.000   |
| Respiratory Failure                 | 55 (20.1)                    | 21 (23.1)                     | 0.551   |
| Sepsis or Infection                 | 115 (42.1)                   | 34 (37.4)                     | 0.424   |
| Toxicology                          | 7 (2.6)                      | 3 (3.3)                       | 0.716   |

**eTable 4.** Subgroup Analysis of Pre- and Post-Modification Enrollment

|                                           | Coefficient | 95% Confidence Interval | p-Value |
|-------------------------------------------|-------------|-------------------------|---------|
| Intervention Group                        | -3569.6     | -5026—2113.0            | <0.0001 |
| Post Modification                         | 1017.1      | -718-2752.6             | 0.250   |
| Overall p-value for model <0.0001         |             |                         |         |
| R <sup>2</sup> =0.0923                    |             |                         |         |
| Delta-Method Adjusted Predictions (n=364) |             |                         |         |
|                                           | Margin      | Standard Error          | p-Value |
| Historical Group                          | 474.7       | 246.5                   | 0.055   |
| Pre-Modification Intervention Group       | -3094.9     | 697.4                   | <0.0001 |
| Post-Modification Intervention Group      | -2077.8     | 539.4                   | <0.0001 |

**eTable 5.** Subgroup Analysis for 72-Hour Post-Shock Fluid Balance Excluding Patients Included Based on Clinical Exam Criteria

|                   | Number | Mean    | 95% Confidence Interval | Standard Deviation | p-Value |
|-------------------|--------|---------|-------------------------|--------------------|---------|
| Pre-Intervention  | 57     | -1300.4 | (871.3-4382.2)          | 377.1              | 0.0038  |
| Post-Intervention | 27     | -3927.1 |                         |                    |         |

**eTable 6.** Interrupted Time Series Analysis

|                                  | Estimate | Approximate<br>Standard Error | p-Value |
|----------------------------------|----------|-------------------------------|---------|
| Study Time                       | 3.65     | 2.89                          | 0.2078  |
| Intervention Group               | -2795.81 | 1005.2                        | 0.0002  |
| Slope Difference Between Cohorts | 15.78    | 15.39                         | 0.3058  |

**eTable 7.** Logistic Regression Model for All-Cause Mortality

|                                                | Odds Ratio | 95% CI    | p-Value |
|------------------------------------------------|------------|-----------|---------|
| Ventilator Time to Furosemide                  | 1.00       | 0.99-1.00 | 0.199   |
| Net Volume Prior to Furosemide                 | 1.00       | 0.99-1.00 | 0.861   |
| SOFA                                           | 1.33       | 1.18-1.49 | <0.001  |
| Age                                            | 1.04       | 1.01-1.06 | 0.002   |
| Intervention Group                             | 0.24       | 0.09-0.68 | 0.007   |
| Overall p-value for model <0.0001              |            |           |         |
| Hosmer–Lemeshow goodness-of-fit test p = 0.139 |            |           |         |
| C-statistic = 0.756                            |            |           |         |

**eTable 8.** Indication for Furosemide Dose Holds in Intervention Group

| Indication                              | Count |
|-----------------------------------------|-------|
| Serum creatinine                        | 8     |
| Net Volume negative 1 liter beyond goal | 20    |
| Hypokalemia                             | 1     |
| Hypernatremia                           | 3     |
| Hypotension                             | 8     |
| Tachycardia                             | 14    |
| Unknown                                 | 13    |
| Goal met/Protocol discontinuation       | 63    |
| No holds                                | 97    |

*8 patients with holds for >1 safety reason*

*18 patients with hold for safety indication plus achievement of extubation or goal net volume status*
